# Supplementary material for: Subsurface oxygen reduction reaction activity on Ti2N MXene revealed byin situRaman spectroelectrochemistry
Source: Royal Society of Chemistry journal article supplement (doi:10.1039/d2se01532c), 2023-01-01
Supplement: d2se01532c1.pdf [file d2se01532c1.pdf]

## Subsurface Oxygen Reduction Reaction Activity on $\text{Ti}_2\text{N}$ MXene Revealed by *In-situ* Raman Spectroelectrochemistry

Eugenie Pranada<sup>1</sup>, Denis Johnson<sup>2</sup>, Ray Yoo<sup>2</sup>, Abdoulaye Djire<sup>1,2\*</sup>

<sup>1</sup>Department of Materials Science and Engineering, Texas A&M University, College Station, TX  
77843, USA

<sup>2</sup>Artie McFerrin Department of Chemical Engineering, Texas A&M University, College Station,  
TX 77843, USA

Corresponding Author: [adjire@tamu.edu](mailto:adjire@tamu.edu)

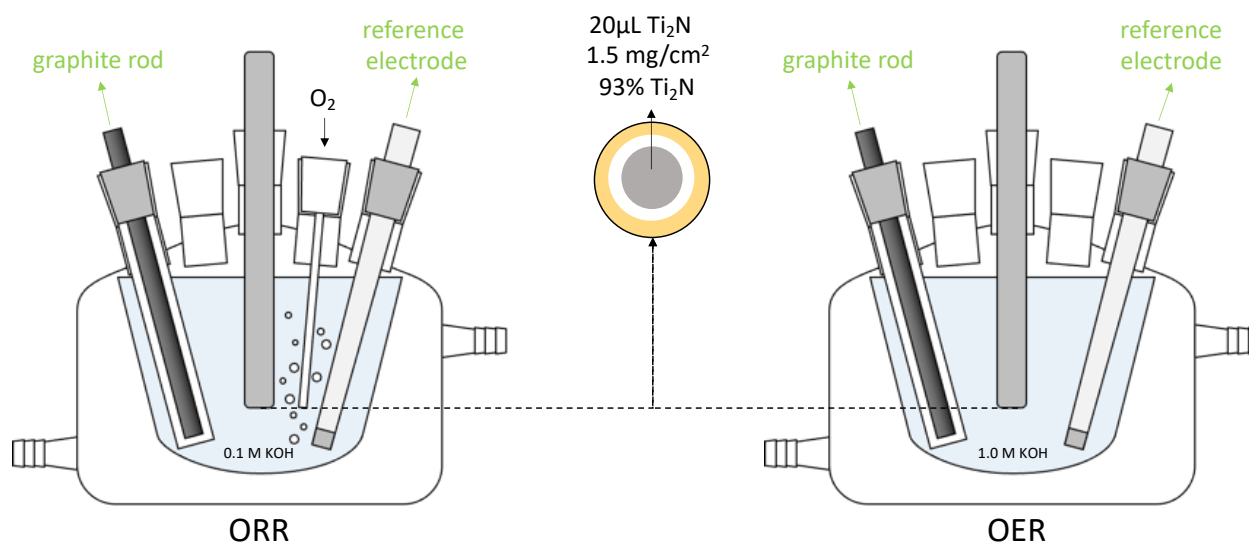

**Figure S1.** Schematic of the three-electrode electrochemical cell used for the electrochemical measurements.

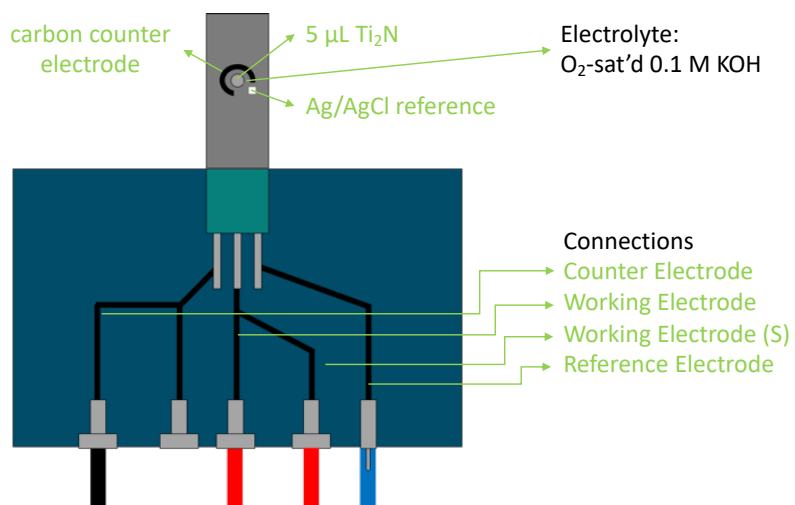

**Figure S2.** Schematic of the screen-printed cell used for the *in-situ/operando* Raman spectroelectrochemistry.

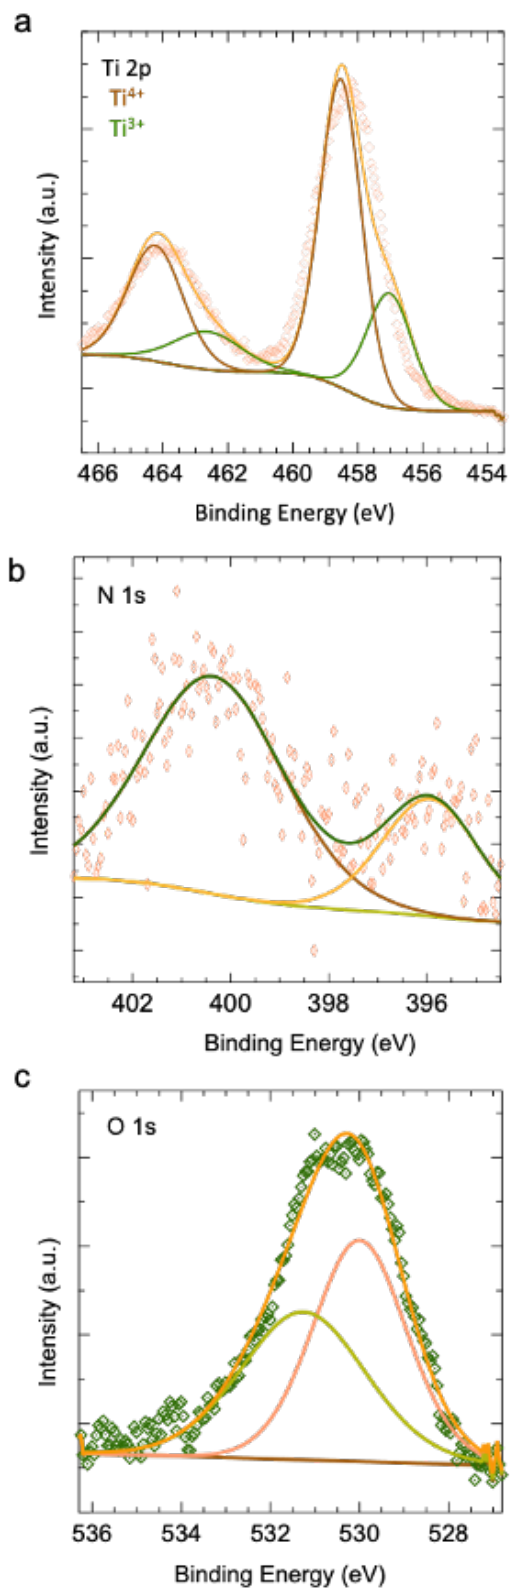

**Figure S3.** XPS Spectra of pristine Ti<sub>2</sub>N Few-layer MXene. a) Ti 2p b) N 1s c) O 1s. The surface chemistry comparison and the passivation layer on the pristine Ti<sub>2</sub>N is tracked according to the Ti 2p and O 1s spectra.

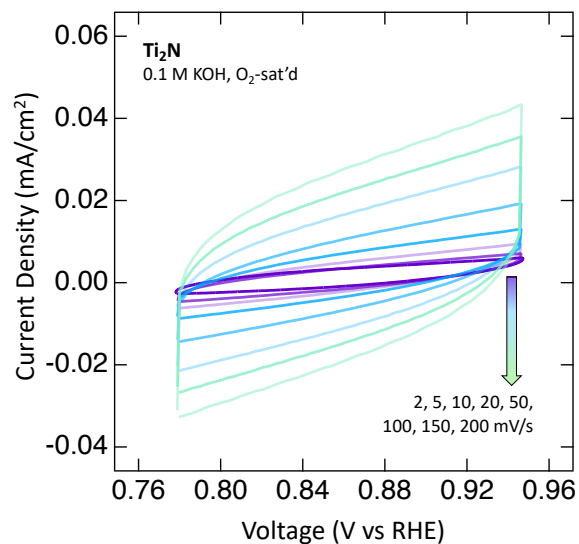

**Figure S4.** CV of  $\text{Ti}_2\text{N}$  in  $0.1 \text{ M KOH}$  electrolytic solution. The data are collected at different scan rates to obtain the electrochemical surface area.

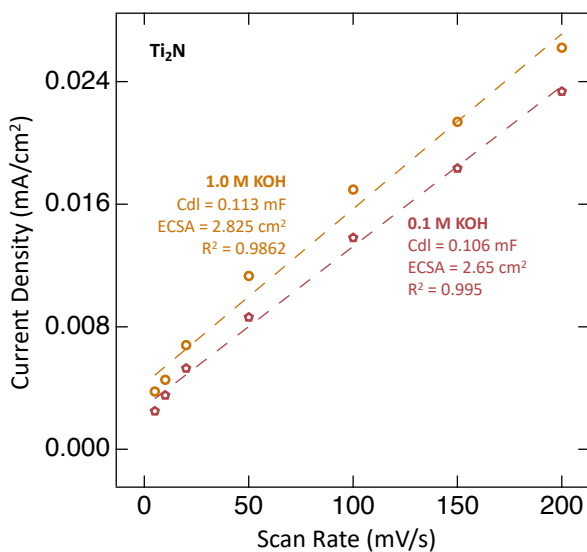

**Figure S5.** Electrochemical surface area (ECSA) of  $\text{Ti}_2\text{N}$  in  $0.1$  and  $1.0 \text{ M KOH}$  electrolytic solutions at  $0.86 \text{ V vs RHE}$ .

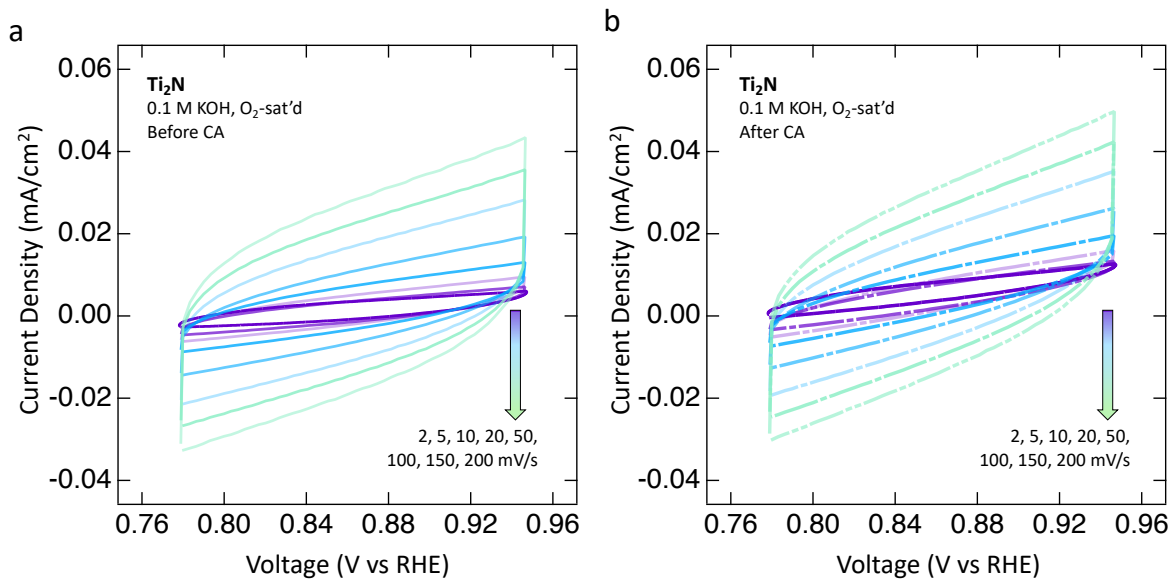

**Figure S6.** CV of  $\text{Ti}_2\text{N}$  with varying scan rates a) before and b) after CA measurements. Data collected in 0.1M KOH electrolytic solution.

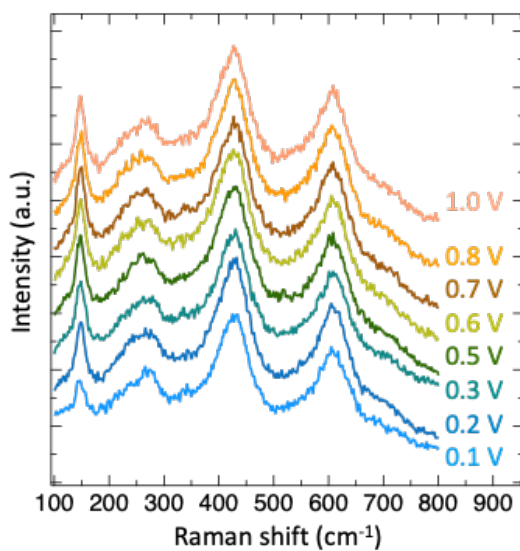

**Figure S7.** Raman spectra of  $\text{Ti}_2\text{N}$  MXene in  $\text{O}_2$ -sat'd 0.1 M KOH, taken at 50% laser power.

**Table S1.** Recent works on ORR in 0.1 M KOH electrolytic solution.

| Catalyst                                                                                          | Potential (V vs RHE) |           | Limiting j (mA/cm <sup>2</sup> ) | Tafel Slope (mV/dec) | CA or CP test (h), % I/I <sub>0</sub> | Ref       |
|---------------------------------------------------------------------------------------------------|----------------------|-----------|----------------------------------|----------------------|---------------------------------------|-----------|
|                                                                                                   | Onset                | Half-wave |                                  |                      |                                       |           |
| 10% Pt/C                                                                                          | 0.91                 | 0.75      | 3.2                              | 94.8                 | 4.5, 47.19                            | This work |
| Ti <sub>2</sub> N                                                                                 | 0.70                 | 0.56      | 1.61                             | 69.3                 | 15, 81.97                             | This work |
| Ti <sub>3</sub> C <sub>2</sub>                                                                    | 0.58                 | 0.50      | 1.1                              | 104.9                | 4.5, 54.53                            | This work |
| SrTiO <sub>3</sub> /Ti <sub>3</sub> C <sub>2</sub>                                                | 0.87 <sup>a</sup>    | 0.78      | 5.63                             | 89.6                 | 5, -                                  | 1         |
| Co/NCNTs@Ti <sub>3</sub> C <sub>2</sub> T <sub>x</sub>                                            | 0.936                | 0.815     | 5.9                              | -                    | 5.6, 92.4                             | 2         |
| FeCo-N-d-Ti <sub>3</sub> C <sub>2</sub>                                                           | 0.96                 | 0.8       | 5.6                              | 108                  | 5.6, 90+                              | 3         |
| MXene@PPy-800                                                                                     | 0.85                 | 0.71      | 4                                | -                    | 2.2, 86.4                             | 4         |
| FePc/Ti <sub>3</sub> C <sub>2</sub> T <sub>x</sub>                                                | 0.95 <sup>a</sup>    | 0.886     | 5.5 <sup>a</sup>                 | -                    | 1.4, 74                               | 5         |
| Co-CNT/Ti <sub>3</sub> C <sub>2</sub> -60                                                         | 0.86 <sup>a</sup>    | 0.82      | 5.55                             | 63                   | 2.8, 90                               | 6         |
| NiCo <sub>2</sub> O <sub>4</sub> /Ti <sub>3</sub> C <sub>2</sub> F <sub>x</sub> (OH) <sub>x</sub> | 0.85 <sup>a</sup>    | 0.7       | 5.82                             | -                    | -                                     | 7         |

*a: estimated from graph*

## References

1. X. Hui, P. Zhang, Z. Wang, D. Zhao, Z. Li, Z. Zhang, C. Wang and L. Yin, *ACS Applied Energy Materials*, 2022, **5**, 6100-6109.
2. Y. Zhang, H. Jiang, Y. Lin, H. Liu, Q. He, C. Wu, T. Duan and L. Song, *Advanced Materials Interfaces*, 2018, **5**.
3. L. Chen, Y. Lin, J. Fu, J. Xie, R. Chen and H. Zhang, *ChemElectroChem*, 2018, **5**, 3307-3314.
4. Y. Lei, N. Tan, Y. Zhu, D. Huo, S. Sun, Y. Zhang and G. Gao, *J. Electrochem. Soc.*, 2020, **167**, 116503.
5. Z. Li, Z. Zhuang, F. Lv, H. Zhu, L. Zhou, M. Luo, J. Zhu, Z. Lang, S. Feng, W. Chen, L. Mai and S. Guo, *Adv Mater*, 2018, **30**, e1803220.
6. J. Chen, X. Yuan, F. Lyu, Q. Zhong, H. Hu, Q. Pan and Q. Zhang, *Journal of Materials Chemistry A*, 2019, **7**, 1281-1286.
7. H. Lei, S. Tan, L. Ma, Y. Liu, Y. Liang, M. S. Javed, Z. Wang, Z. Zhu and W. Mai, *ACS Appl Mater Interfaces*, 2020, **12**, 44639-44647.
